# Supplementary material
Source: PubMed Central journal article supplement (PMC5244307)
Supplement: AEM.02266-16_zam999117621s1.pdf [file AEM.02266-16_zam999117621s1.pdf]

| Strain           | Habitat of Origin      | Isolation Strategy | GenBank or EMBL Accession |               |                         |              |               |          |               |
|------------------|------------------------|--------------------|---------------------------|---------------|-------------------------|--------------|---------------|----------|---------------|
|                  |                        |                    | SSU rRNA and/or ITS       | glnA          | MLSA                    | catA         | nasA          | Pept.    | Genome        |
| QLW-P1DMWA-1     | Pond-1                 | sDAM               | AJ879783.1                | FN823098.2    | CP000655                | ND           | LT622191      | LT622210 | CP000655      |
| QLW-P1DNSYA-2    | Pond-1                 | sDAM               | AJ879800.1                | HE646491.1    | HE646484.1 - HE646494.1 | ND           | NS            | LT622211 | NS            |
| QLW-P1FAT50D-2   | Pond-1                 | sFAM               | AJ879799.1                | HE646502.1    | HE646495.1 - HE646505.1 | ND           | NS            | LT622212 | NS            |
| P1-Kol5          | Pond-1                 | DP                 | HE646564.1                | HE646480.1    | HE646473.1 - HE646483.1 | ND           | NS            | LT622213 | NS            |
| P1-Kol6          | Pond-1                 | DP                 | HE646566.1                | HE646524.1    | HE646517.1 - HE646527.1 | ND           | ND            | LT622214 | NS            |
| P1-Kol7          | Pond-1                 | DP                 | HE646567.1                | HE646535.1    | HE646528.1 - HE646538.1 | ND           | LT622192      | LT622215 | NS            |
| P1-Kol8          | Pond-1                 | DP                 | HE646568.1                | HE646546.1    | HE646539.1 - HE646549.1 | ND           | ND            | LT622216 | LVL000000000  |
| P1-05-13         | Pond-1                 | sFAM               | HE646561.1                | HE646447.1    | HE646440.1 - HE646450.1 | ND           | LT622193      | LT622217 | NS            |
| P1-05-86         | Pond-1                 | sFAM               | HE646569.1                | HE646557.1    | HE646550.1 - HE646560.1 | ND           | ND            | LT622218 | NS            |
| P1-4-10KL        | Pond-1                 | tDAM               | HE646565.1                | HE646513.1    | HE646506.1 - HE646516.1 | ND           | LT622194      | LT622219 | LVJ000000000  |
| P1-4-10GR        | Pond-1                 | tDAM               | HE646562.1                | HE646458.1    | HE646451.1 - HE646461.1 | ND           | NS            | LT622220 | NS            |
| P1-3-8A          | Pond-1                 | tDAM               | HE646563.1                | HE646469.1    | HE646462.1 - HE646472.1 | ND           | NS            | LT622221 | NS            |
| QLW-P2DMWB-1     | Pond-2                 | sDAM               | FN429654.1                | FN823099.2    | HE647093.1 - HE647101.1 | ND           | LT622195      | LT622222 | NS            |
| MWH-Tro5-3-9     | Pond Trog-5            | tDAM               | FN429711.1                | FN823185.2    | HE646931.1 - HE646939.1 | LT622179     | LT622196      | LT622223 | NS            |
| MWH-Tro5-4-4     | Pond Trog-5            | tDAM               | HE647119.1                | HE647104.1    | HE646940.1 - HE646948.1 | NS           | NS            | LT622224 | NS            |
| MWH-Tro6-1-1     | Pond Trog-6            | tDAM               | HE647120.1                | HE647105.1    | HE646949.1 - HE646957.1 | LT622180     | LT622197      | ND       | NS            |
| MWH-Tro6-4-2     | Pond Trog-6            | tDAM               | FN429712.1                | FN823186.2    | HE646967.1 - HE646975.1 | NS           | NS            | ND       | NS            |
| MWH-Tro6-1-6     | Pond Trog-6            | tDAM               | HE647121.1                | HE647106.1    | HE646958.1 - HE646966.1 | LT622181     | LT622198      | LT622225 | NS            |
| MWH-Tro7-1-10    | Pond Trog-7            | tDAM               | HE647123.1                | HE647108.1    | HE646985.1 - HE646993.1 | NS           | NS            | LT622226 | NS            |
| MWH-Tro7-2-5     | Pond Trog-7            | tDAM               | HE647122.1                | HE647107.1    | HE646994.1 - HE647002.1 | NS           | NS            | LT622227 | NS            |
| MWH-Tro7-2-8KL   | Pond Trog-7            | tDAM               | HE647125.1                | HE647110.1    | HE647012.1 - HE647020.1 | NS           | NS            | LT622228 | NS            |
| MWH-Tro7-2-8GR   | Pond Trog-7            | tDAM               | HE647124.1                | HE647109.1    | HE647003.1 - HE647011.1 | LT622182     | LT622199      | LT622229 | NS            |
| MWH-Tro7-1-4     | Pond Trog-7            | tDAM               | FN429713.1                | FN823187.2    | HE646976.1 - HE646984.1 | LT622183     | LT622200      | LT622230 | LVL000000000  |
| MWH-Tro8-2-1     | Pond Trog-8            | tDAM               | HE647126.1                | HE647111.1    | HE647021.1 - HE647029.1 | NS           | LT622201      | LT622231 | NS            |
| MWH-Tro8-2-5     | Pond Trog-8            | tDAM               | HE647127.1                | HE647112.1    | HE647030.1 - HE647038.1 | NS           | LT622202      | LT622232 | NS            |
| MWH-Tro8-3-6     | Pond Trog-8            | tDAM               | HE647128.1                | HE647113.1    | HE647048.1 - HE647056.1 | NS           | LT622203      | LT622233 | NS            |
| MWH-Tro8-4-1     | Pond Trog-8            | tDAM               | HE647129.1                | HE647114.1    | HE647057.1 - HE647065.1 | LT622184     | LT622204      | LT622234 | NS            |
| MWH-Tro8-4-4     | Pond Trog-8            | tDAM               | HE647130.1                | HE647115.1    | HE647066.1 - HE647074.1 | NS           | LT622205      | LT622235 | NS            |
| MWH-Tro8-2-9     | Pond Trog-8            | tDAM               | FN429710.1                | FN823183.2    | HE647039.1 - HE647047.1 | LT622185     | LT622206      | LT622236 | LVL000000000  |
| Tro8F10W22       | Pond Trog-8            | sFAM               | CP015018                  | LN908882.1    | CP015018                | LT622186     | LT622207      | ND       | CP015018      |
| MWH-RechtKolB    | Pond Rechteckteich     | sFAM               | FN429668.1                | FN823145.2    | HE646913.1 - HE646921.1 | LT622187     | ND            | ND       | CP015016      |
| MWH-RechtKolC    | Pond Rechteckteich     | sFAM               | HE647118.1                | HE647103.1    | HE646922.1 - HE646930.1 | NS           | ND            | ND       | NS            |
| MWH-RechtKol4    | Pond Rechteckteich     | sFAM               | HE647117.1                | HE647102.1    | HE646904.1 - HE646912.1 | LT622188     | ND            | ND       | CP015017      |
| MWH-Recht1       | Pond Rechteckteich     | tDAM               | FN429706.1                | FN823146.2    | HE646895.1 - HE646903.1 | NS           | ND            | ND       | LVLE000000000 |
| MWH-GrInsel-1    | Pond Großer Inselteich | tDAM               | FN556009.1                | FN823190.2    | HE646886.1 - HE646894.1 | LT622189     | ND            | ND       | NS            |
| MWH-Unterer-4A-1 | Pond Unterer Teich     | tDAM               | FN429705.1                | FN823182.2    | HE647075.1 - HE647083.1 | LT622190     | LT622208      | LT622237 | NS            |
| MWH-Unterer-4A-2 | Pond Unterer Teich     | tDAM               | HE647131.1                | HE647116.1    | HE647084.1 - HE647092.1 | NS           | LT622209      | ND       | NS            |
| QLW-P1FAT50C-4   | Pond-1                 | sFAM               | AJ879778.1                | FN823104.2    | CP015922                | CP015922     | CP015922      | ND       | CP015922      |
| QLW-P1DATA-2     | Pond-1                 | sDAM               | AJ879801.1                | FN823102.2    | LZMQ00000000            | ND           | ND            | ND       | LZMQ00000000  |
| MWH-Tro8-2-5gr   | Pond-1                 | sFAM               | LZMR000000000             | LZMR000000000 | LZMR000000000           | ND           | LZMR000000000 | ND       | LZMR000000000 |
| MWH-Adler-W8     | Adlerlacke             | sFAM               | FN429735.1                | FN823208.2    | LZFI00000000            | LZFI00000000 | LZFI00000000  | ND       | LZFI00000000  |

sDAM, standard Dilution Acclimatization Method; sFAM, standard Filtration Acclimatization Method; tDAM, targeted isolation by DAM; DP, direct plating of dilutions on NSY agar plates

ND, not detected by PCR; NS, detected by PCR but not sequenced

**Table S1.** List of the 37 cultivated *P. asymbioticus* and the four *Polynucleobacter* sp. strains including accession numbers.

| Habitat                | Site               | Geographic Coordinates | Altitude (m.a.s.l.) | Max. Depth (m) | pH  | Conductivity ( $\mu\text{S cm}^{-1}$ ) | PnecC (% of bact.)* | <i>P. asymbioticus</i> (% of bact.) |
|------------------------|--------------------|------------------------|---------------------|----------------|-----|----------------------------------------|---------------------|-------------------------------------|
| Pond-1                 | Loibersbacher Höhe | N 47.740° E 13.302°    | 1286                | 1.2            | 5.4 | 11.3                                   | 32                  | 12 <sup>†</sup>                     |
| Pond-2                 | Loibersbacher Höhe | N 47.739° E 13.302°    | 1297                | 0.6            | 5.5 | 10.0                                   | 38                  | 9 <sup>†</sup>                      |
| Pond Unterer Teich     | Rauriser Urwald    | N 47.078° E 12.989°    | 1676                | ND             | 5.8 | 7.7                                    | 35                  | ND                                  |
| Pond Großer Inselteich | Rauriser Urwald    | N 47.075° E 12.991°    | 1704                | ND             | 5.0 | 10.1                                   | 27                  | ND                                  |
| Pond Rechteckteich     | Rauriser Urwald    | N 47.076° E 12.995°    | 1731                | 1.2            | 5.2 | 6.7                                    | 59                  | ND                                  |
| Pond Trog-8            | Trög               | N 47.249° E 13.266°    | 1958                | 2.0            | 4.9 | 7.2                                    | 39                  | ND                                  |
| Pond Trog-7            | Trög               | N 47.250° E 13.267°    | 1962                | 1.7            | 5.7 | 3.7                                    | 33                  | ND                                  |
| Pond Trog-5            | Trög               | N 47.249° E 13.270°    | 1965                | ND             | 4.8 | 7.6                                    | 48                  | ND                                  |
| Pond Trog-6            | Trög               | N 47.250° E 13.272°    | 2001                | ND             | 5.1 | 5.1                                    | 51                  | ND                                  |
| Adlerlacke             | -                  | N 47.373° E 12.093°    | 1770                | ND             | 4.8 | 9.2                                    | 43                  | ND                                  |

ND = not determined

values for pH, conductivity, PnecC and *P. asymbioticus* are the means of multiple measurements

\* determined by FISH probe PnecC-16S-445 (Hahn MW, Pockl M, Wu QL. 2005. Appl Environ Microbiol 71:4539-4547.)

<sup>†</sup> Hahn MW, Scheuerl T, Jezberova J, Koll U, Jezbera J, Simek K, Vannini C, Petroni G, Wu QL. 2012. PLoS One 7:e32772.

**Table S2.** Characterization of the nine habitats of origin of the *P. asymbioticus* strains and the habitat of origin of one *Polynucleobacter* sp. strain.

| Strain        | Sequencing    | Yield (Mbp) | read count | %Q30  | Mean Q |
|---------------|---------------|-------------|------------|-------|--------|
| P1-4-10KL     | MiSeq 2x150bp | 771         | 5,142,282  | 97.96 | 37.76  |
| P1-Kol8       | MiSeq 2x150bp | 181         | 1,204,432  | 95.87 | 37.09  |
| MWH-Tro-7-1-4 | MiSeq 2x150bp | 316         | 2,109,486  | 97.66 | 37.67  |
| MWH-Tro-8-2-9 | MiSeq 2x150bp | 434         | 2,893,930  | 96.93 | 37.45  |
| Tro8F10W22    | MiSeq 2x300bp | 222         | 738,492    | 80.41 | 32.03  |
| MWH-Recht1    | MiSeq 2x150bp | 367         | 2,449,702  | 98.01 | 37.78  |
| MWH-RechtKolB | MiSeq 2x150bp | 482         | 3,210,870  | 97.49 | 37.62  |
| MWH-RechtKol4 | MiSeq 2x150bp | 209         | 1,390,006  | 96.53 | 37.27  |

- "Yield (Mbp)": number of bases called in mega bases.
- All reads are passed filter, i.e. reads have passed the default Illumina filter procedure (chastity filter).
- "%Q30": represents the percentage of bases with a quality score of at least 30 (inferred base call accuracy of 99.9%).  
The Q-score is a prediction of the probability of a wrong base call.

**Table S3.** Sequencing statistics for eight *P. asymbioticus* genomes.

| Strain        | hash length | number of nodes | N50 (bp) | max. node length (bp) | total length (bp) | total reads | used reads | average coverage |
|---------------|-------------|-----------------|----------|-----------------------|-------------------|-------------|------------|------------------|
| P1-4-10KL     | 135         | 51              | 699,341  | 818,821               | 2,160,771         | 5,142,282   | 4,749,862  | 330              |
| P1-Kol8       | 97          | 67              | 229,702  | 461,334               | 2,159,551         | 1,099,684   | 1,067,096  | 74               |
| MWH-Tro-7-1-4 | 127         | 46              | 267,647  | 639,815               | 2,221,922         | 2,109,486   | 1,962,288  | 132              |
| MWH-Tro-8-2-9 | 131         | 57              | 287,834  | 461,381               | 2,287,817         | 2,893,930   | 2,631,366  | 173              |
| Tro8F10W22    | 97          | 45              | 282,233  | 531,708               | 2,197,670         | 718,464     | 702,193    | 96               |
| MWH-Recht1    | 133         | 45              | 363,948  | 500,247               | 2,128,350         | 2,449,702   | 2,274,965  | 160              |
| MWH-RechtKolB | 137         | 34              | 295,536  | 555,775               | 2,352,775         | 3,210,870   | 2,924,163  | 186              |
| MWH-RechtKol4 | 97          | 38              | 286,500  | 574,860               | 2,379,812         | 1,291,174   | 1,255,593  | 79               |

The table refers to the Velvet assembly output. Some gaps between contigs have been closed subsequently.

**Table S4.** Statistics after the assembly with Velvet.

| GI variant    | genome                    | GI position | length (kbp) | CDS count  | IMG/ER scaffold ID      | start coordinate | end coordinate |
|---------------|---------------------------|-------------|--------------|------------|-------------------------|------------------|----------------|
| <b>CSC</b>    | QLW-P1DMWA-1              | 2           | 62           | 65         | 2639765941              | 281483           | 343853         |
|               | P1-4-10KL                 | 2           | 56           | 65         | 2639765857              | 287436           | 343853         |
|               | P1-Kol8 <sup>†</sup>      | 2           | 75           | 90         | 2639765884 - 2639765887 | 158746           | 18019          |
|               | MWH-Tro7-1-4              | 2           | 90           | 99         | 2636567154              | 311481           | 401453         |
|               | MWH-Tro8-2-9              | 2           | 92           | 100        | 2639765932              | 282668           | 374712         |
|               | Tro8F10W22                | 2           | 79           | 89         | 2636562151              | 280050           | 359460         |
|               | MWH-Recht1 <sup>†</sup>   | 2           | 59           | 62         | 2639765903 - 2639765907 | 289927           | 18897          |
|               | MWH-RechtKolB             | 2           | 282          | 109        | 2636567168              | 323497           | 605182         |
| MWH-RechtKol4 | 2                         | 281         | 109          | 2636493768 | 323497                  | 604711           |                |
| <b>ACD</b>    | MWH-Tro7-1-4 <sup>†</sup> | 5           | 77           | 86         | 2636567154 - 2636567156 | 632362           | 15000          |
|               | MWH-Tro8-2-9              | 5           | 76           | 81         | 2639765932              | 609604           | 685229         |
|               | Tro8F10W22                | 5           | 77           | 84         | 2636562151              | 592616           | 669579         |
|               | MWH-RechtKolB             | 21          | 48           | 52         | 2636567168              | 2007660          | 2055751        |
|               | MWH-RechtKol4             | 21          | 48           | 52         | 2636493768              | 2034104          | 2082195        |
| <b>NIT</b>    | QLW-P1DMWA-1              | 12          | 17           | 16         | 2639765941              | 988990           | 1005961        |
|               | P1-4-10KL                 | 12          | 17           | 16         | 2639765857              | 988990           | 1005961        |
|               | MWH-Tro7-1-4              | 12          | 17           | 16         | 2636567156              | 1120719          | 1137690        |
|               | MWH-Tro8-2-9              | 9           | 19           | 19         | 2639765932              | 963412           | 982591         |
|               | Tro8F10W22                | 12          | 17           | 16         | 2636562151              | 1079595          | 1096566        |
| <b>LIP</b>    | MWH-RechtKol4             | 10          | 28           | 26         | 2636493768              | 1015955          | 1044433        |
| <b>COD</b>    | MWH-Tro7-1-4              | 19          | 15           | 13         | 2636567164              | 1787751          | 1802581        |
|               | Tro8F10W22                | 19          | 15           | 13         | 2636562151              | 1793404          | 1808234        |
|               | MWH-RechtKolB             | 12          | 22           | 16         | 2636567168              | 1139510          | 1161737        |
|               | MWH-RechtKol4             | 12          | 22           | 16         | 2636493768              | 1158343          | 1180570        |
| <b>GGR</b>    | QLW-P1DMWA-1              | 14          | 42           | 8          | 2639765941              | 1102705          | 1144985        |
|               | P1-4-10KL <sup>†</sup>    | 14          | 44           | 33         | 2639765857 - 2639765882 | 1102705          | 20039          |
|               | P1-Kol8 <sup>†</sup>      | 14          | 42           | 18         | 2639765889 - 2639765899 | 749742           | 23699          |
|               | MWH-Tro7-1-4 <sup>†</sup> | 14          | 27           | 16         | 2636567156 - 2636567164 | 542792           | 12404          |
|               | Tro8F10W22                | 14          | 94           | 54         | 2636562151              | 1182944          | 1277293        |
|               | MWH-Recht1 <sup>†</sup>   | 14          | 30           | 17         | 2639765907 - 2639765916 | 806835           | 12562          |
| <b>SUL</b>    | MWH-RechtKolB             | 17          | 10           | 11         | 2636567168              | 1699391          | 1709669        |
|               | MWH-RechtKol4             | 17          | 10           | 11         | 2636493768              | 1725835          | 1736113        |
| <b>HMR</b>    | QLW-P1DMWA-1              | 20          | 26           | 29         | 2639765941              | 1737019          | 1762904        |
|               | P1-4-10KL                 | 20          | 26           | 29         | 2639765882              | 1738918          | 1764803        |
|               | P1-Kol8                   | 20          | 26           | 29         | 2639765902              | 1738138          | 1764014        |
|               | MWH-Tro8-2-9              | 20          | 48           | 39         | 2639765938              | 1841582          | 1889998        |
|               | MWH-Recht1                | 20          | 26           | 29         | 2639765927              | 1731909          | 1757794        |

CSC, cell surface composition; ACD, aromatic compound degradation; NIT, nitrate assimilation; LIP, lipid metabolism; COD, carbon-monoxide dehydrogenation; GGR, giant gene region; SUL, sulfate transport; HMR, heavy metal resistance

<sup>†</sup> scaffolds could not be assembled in the region of the respective GI

**Table S5.** Characterization of eight selected GI variants.

| Strain           | Pept.* | GT1 | GT2 | NAT | NDP | UDP | assigned CSC type |
|------------------|--------|-----|-----|-----|-----|-----|-------------------|
| QLW-P1DMWA-1     | 1      |     |     |     |     |     | A1                |
| QLW-P1DNSYA-2    | 1      |     |     |     |     |     | A1                |
| QLW-P1FAT50D-2   | 1      |     |     |     |     |     | A1                |
| P1-Kol5          | 1      |     |     |     |     |     | A1                |
| P1-Kol6          | 5      |     |     |     |     |     | B5                |
| P1-Kol7          | 1      |     |     |     |     |     | A1                |
| P1-Kol8          | 5      |     |     |     |     |     | B5                |
| P1-05-13         | 1      |     |     |     |     |     | A1                |
| P1-05-86         | 5      |     |     |     |     |     | B5                |
| P1-4-10KL        | 1      |     |     |     |     |     | A1                |
| P1-4-10GR        | 1      |     |     |     |     |     | A1                |
| P1-3-8A          | 1      |     |     |     |     |     | A1                |
| QLW-P2DMWB-1     | 1      |     |     |     |     |     | A1                |
| MWH-Tro5-3-9     | 6      |     |     |     |     |     | C6                |
| MWH-Tro5-4-4     | 6      |     |     |     |     |     | C6                |
| MWH-Tro6-1-1     |        |     |     |     |     |     | D-                |
| MWH-Tro6-4-2     |        |     |     |     |     |     | D-                |
| MWH-Tro6-1-6     | 1      |     |     |     |     |     | E1                |
| MWH-Tro7-1-10    | 3      |     |     |     |     |     | F3                |
| MWH-Tro7-2-5     | 3      |     |     |     |     |     | F3                |
| MWH-Tro7-2-8KL   | 3      |     |     |     |     |     | F3                |
| MWH-Tro7-2-8GR   | 3      |     |     |     |     |     | F3                |
| MWH-Tro7-1-4     | 4      |     |     |     |     |     | F4                |
| MWH-Tro8-2-1     | 6      |     |     |     |     |     | C6                |
| MWH-Tro8-2-5     | 6      |     |     |     |     |     | C6                |
| MWH-Tro8-3-6     | 6      |     |     |     |     |     | C6                |
| MWH-Tro8-4-1     | 6      |     |     |     |     |     | C6                |
| MWH-Tro8-4-4     | 6      |     |     |     |     |     | C6                |
| MWH-Tro8-2-9     | 2      |     |     |     |     |     | C2                |
| Tro8F10W22       |        |     |     |     |     |     | G-                |
| MWH-RechtKolB    |        |     |     |     |     |     | H-                |
| MWH-RechtKolC    |        |     |     |     |     |     | H-                |
| MWH-RechtKol4    |        |     |     |     |     |     | H-                |
| MWH-Recht1       |        |     |     |     |     |     | D-                |
| MWH-GrInsel-1    |        |     |     |     |     |     | H-                |
| MWH-Unterer-4A-1 | 1      |     |     |     |     |     | I1                |
| MWH-Unterer-4A-2 |        |     |     |     |     |     | H-                |

\* numbers are depicting the sequence type of the sequenced PCR product

**Pept.**, Peptidoglycan/LPS O-acetylase OafA/YrhL, contains acyltransferase and SGNH-hydrolase domains

**GT1**, Glycosyltransferase involved in LPS biosynthesis, GR25 family

**GT2**, glycosyl transferase, family 25

**NAT**, N-acetylglucosaminyldiphosphoundecaprenol N-acetyl-beta-D-mannosaminyltransferase

**NDP**, NDP-sugar epimerase, incl. UDP-GlcNAc-inverting 4,6-dehydratase FlaA1 and capsular polysacc. biosynth. prot. EpsC

**UDP**, UDP-N-acetylmuramyl pentapeptide phosphotransferase

 detected by PCR

 not detected by PCR

**Table S6.** Presence/absence pattern for six genes contained in CSC and Peptidoglycan/LPS O-acetylase sequence type.

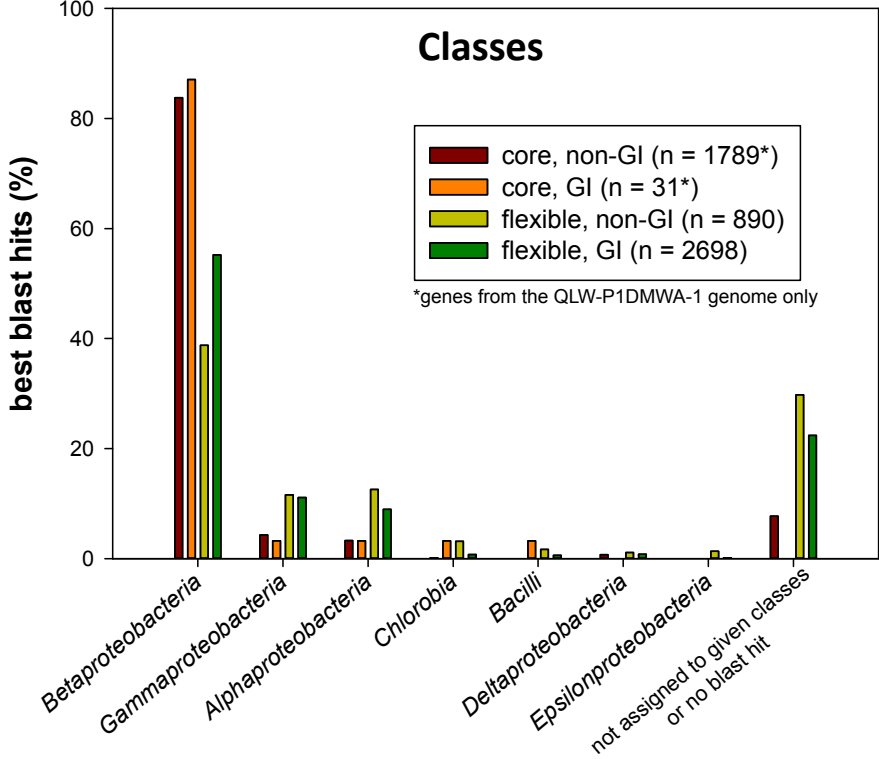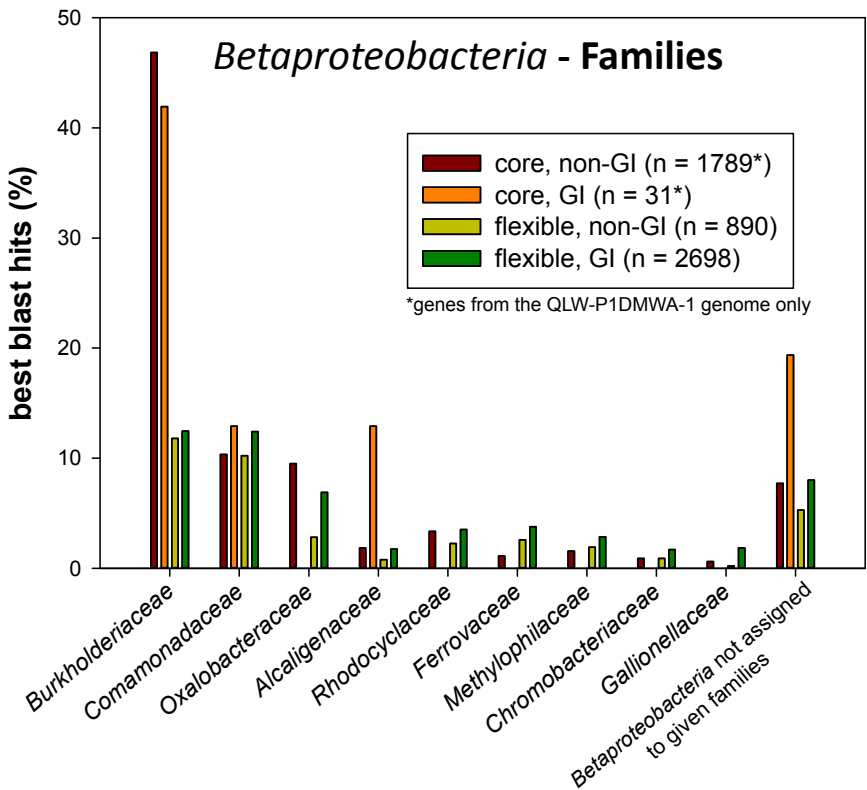

**Figure S1.** Best blast hit analysis of four groups of genes (core non-GI, core GI, flexible non-GI and flexible GI). Taxonomic assignment is shown on the rank of classes and for *Betaproteobacteria* on the rank of families.

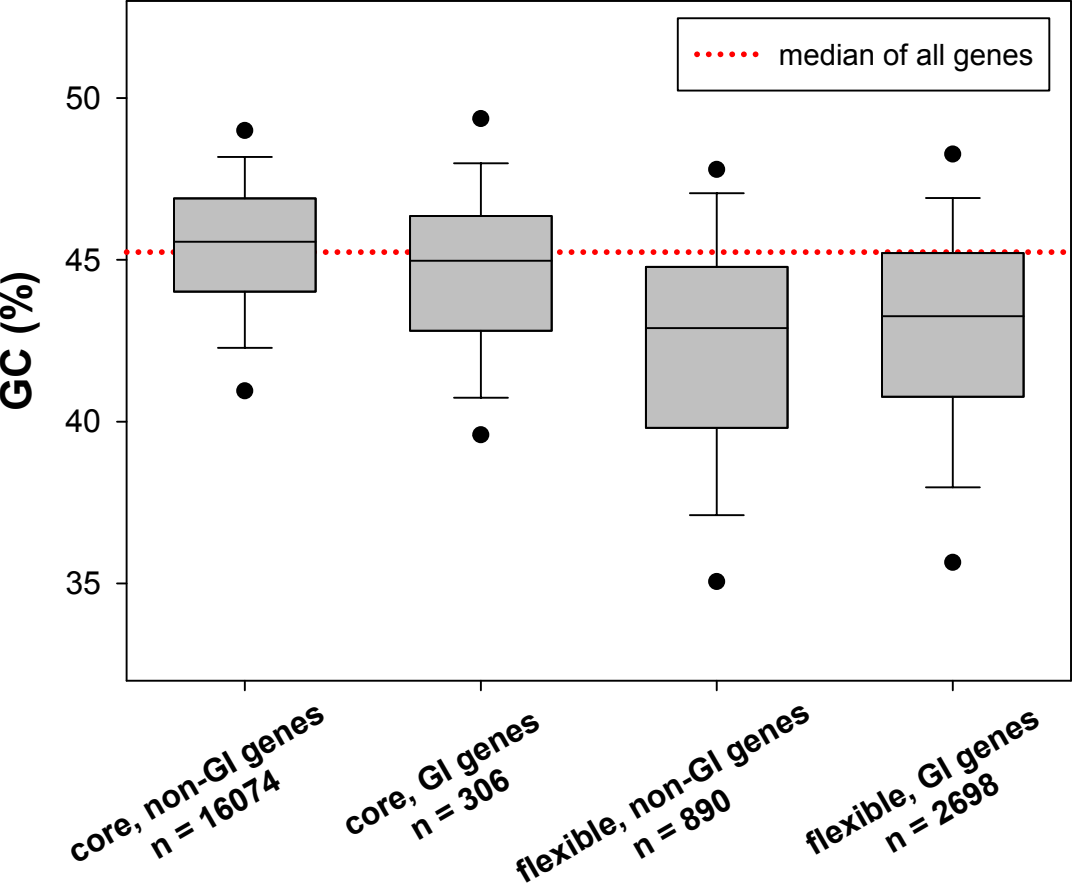

**Figure S2.** GC% distribution of the genes in the four groups.



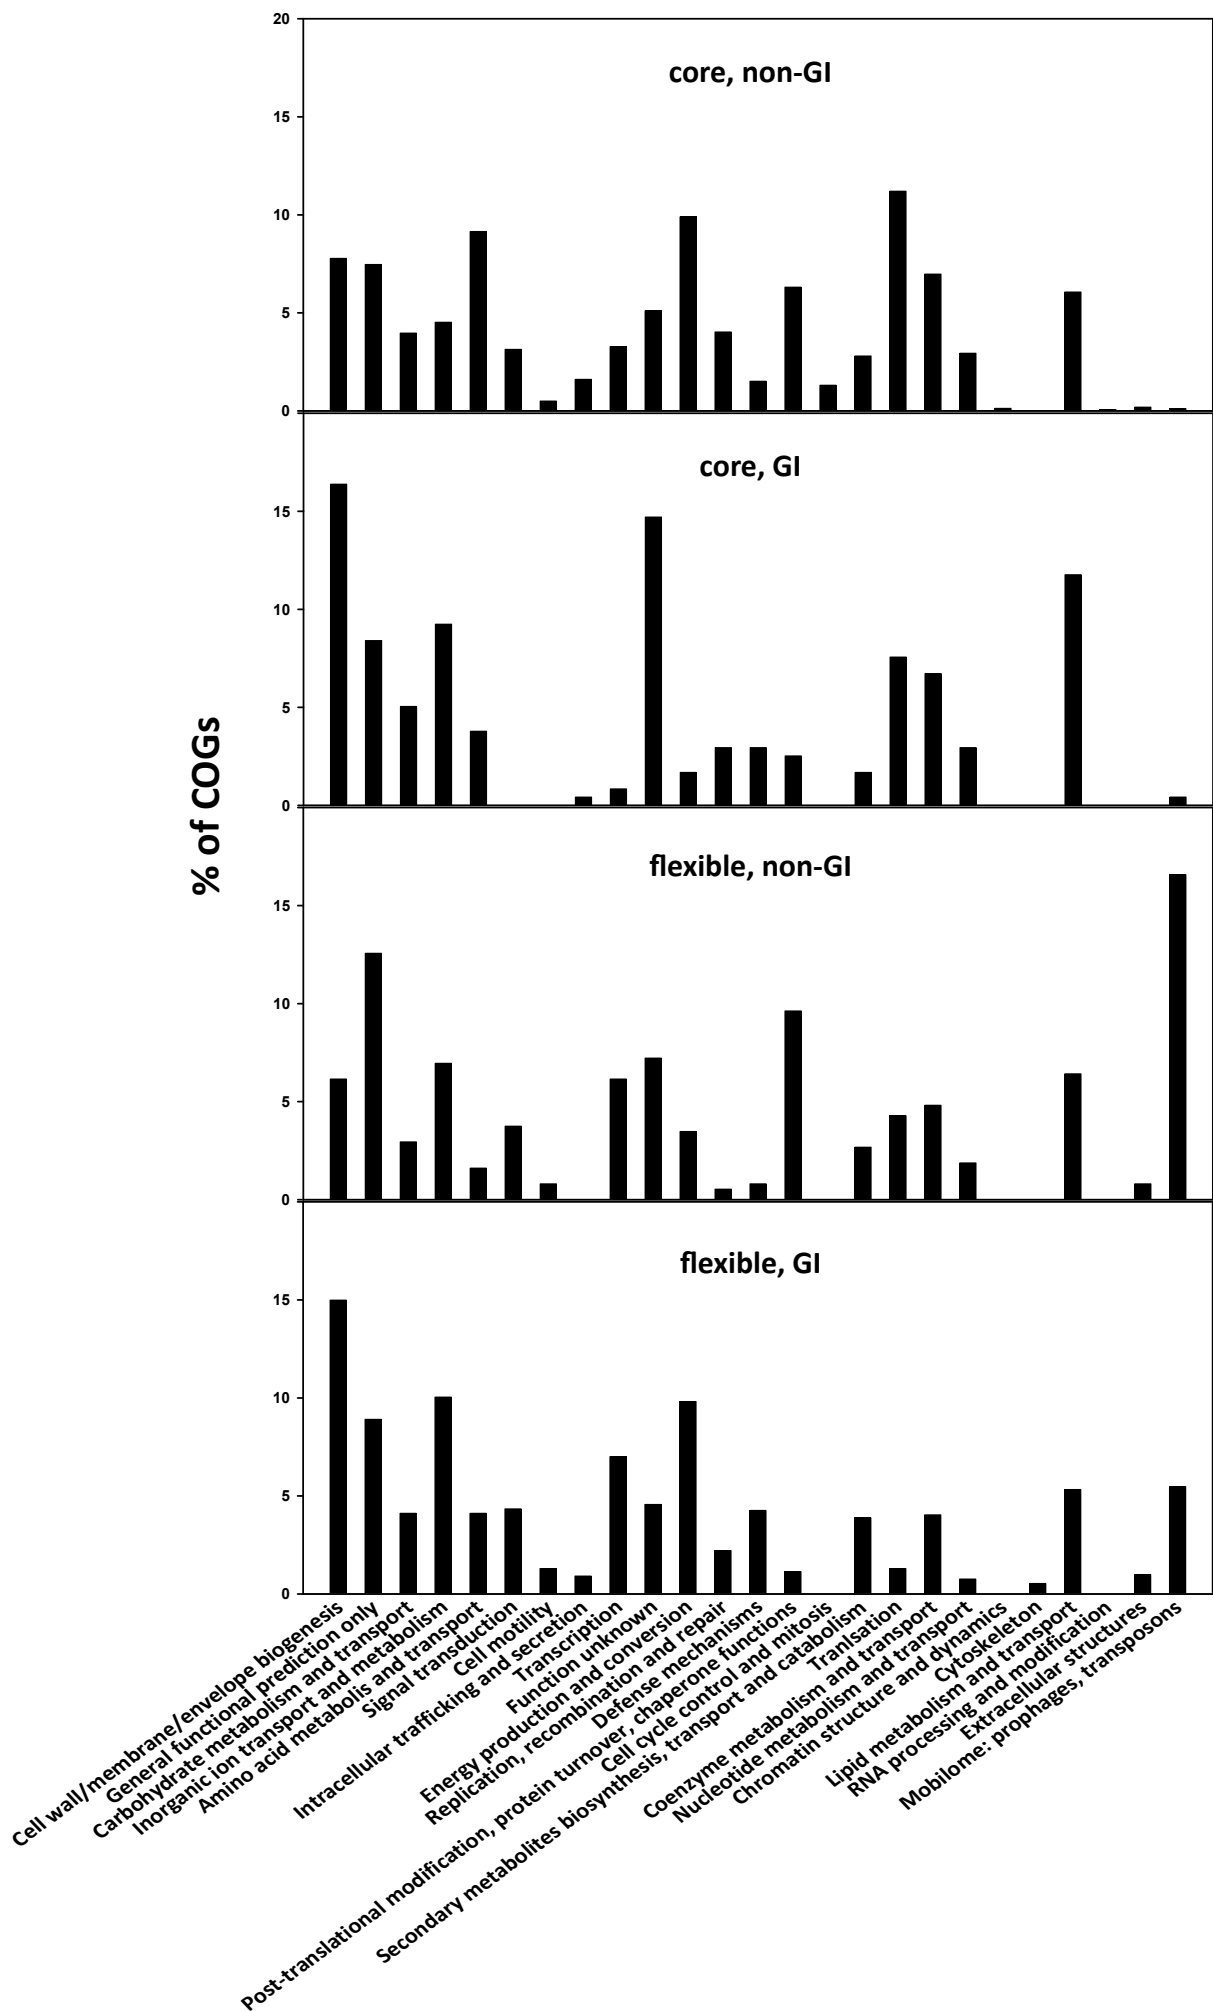

Figure S3. COGs distribution of the genes in the four groups.

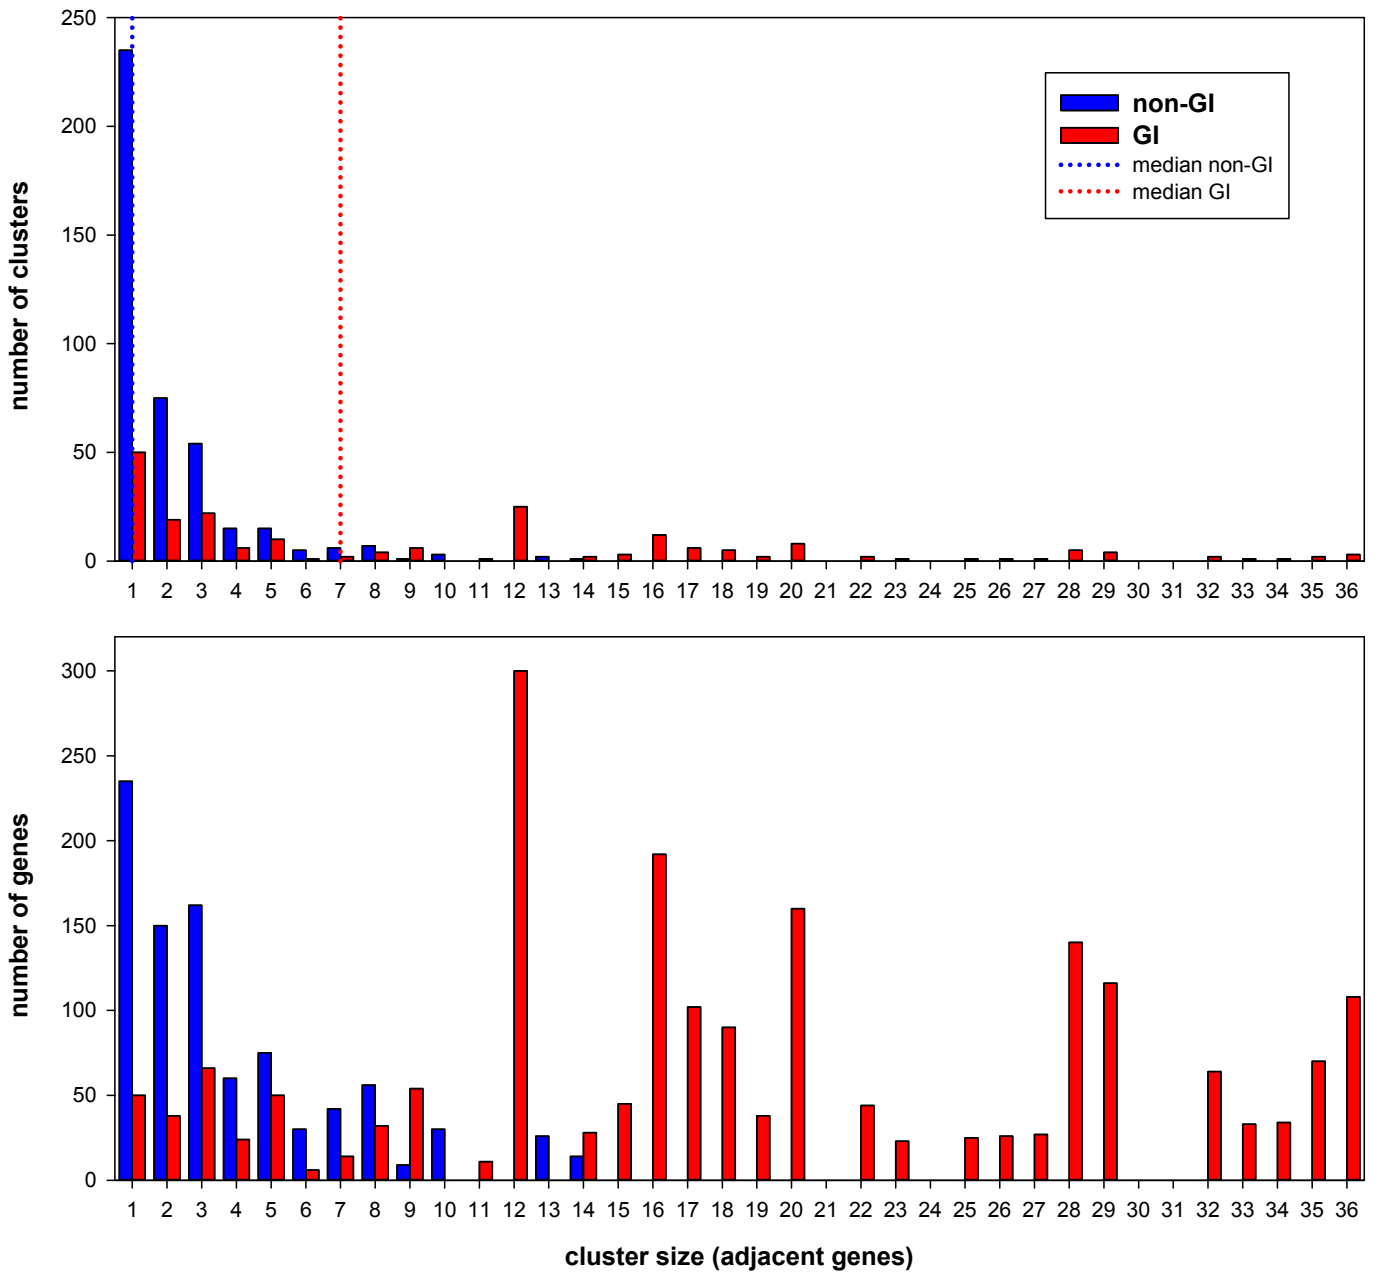

**Figure S4.** Clustering of flexible GI and non-GI genes.
